# Supplementary material
Source: Research Square preprint supplement (doi:10.21203/rs.3.rs-8783837/v1)
Supplement: Supplementary file 1 [file 5d94b47b4ac2fa2c8f4eba8a.docx]

**Supplementary Results**

**Logistic regression estimates and Propensity Score Matching results for dietary diversity**

| **Income source** | **Coefficient** | **Std. err.** | **z** | **P>z** | **CI95%** | |
| --- | --- | --- | --- | --- | --- | --- |
| Women age | .013 | .006 | 2.18 | 0.029 | .001 | .025 |
| Middle tertile | .304 | .150 | 2.02 | 0.043 | .009 | .600 |
| Third tertile | .947 | .149 | 6.32 | 0.000 | .653 | 1.241 |
| Primary education | .234 | .164 | 1.42 | 0.154 | -.087 | .556 |
| Secondary education | .857 | .154 | 5.57 | 0.000 | .555 | 1.159 |
| Household size | -.046 | .125 | -0.37 | 0.713 | -.291 | .198 |
| Underweight | -.326 | .135 | -2.40 | 0.016 | -.592 | -.060 |
| Overweight | .044 | .345 | 0.13 | 0.899 | -.633 | .721 |
| Food security status | -.446 | .258 | -1.73 | 0.084 | -.954 | .060 |
| _**cons** | -1.033 | .352 | -2.93 | 0.003 | -1.723 | -.342 |
| **Average Treatment Effect on the Treated** |  |  |  |  |  |  |
| ATT | 0.187 | 0.058 | 3.23 | 0.001 | 0.074 | 0.301 |
